# Supplementary material for: Triethyl phosphate in an antisolvent: a novel approach to fabricate high-efficiency and stable perovskite solar cells under ambient air conditions
Source: Royal Society of Chemistry journal article supplement (doi:10.1039/d1qm00680k), 2021-01-01
Supplement: d1qm00680k1.pdf [file d1qm00680k1.pdf]

## Supplementary Information

# Triethyl phosphate in antisolvent: A novel approach to fabricate high efficiency and stable perovskite solar cells under ambient air

*Pengyun Zhang<sup>a</sup>, Ningxia Gu<sup>a</sup>, Xiang Chen<sup>a</sup>, Lixin Song<sup>a\*</sup>, Pingfan Du<sup>a</sup>, Wei-Hsiang Chen<sup>b</sup>, Jie Xiong<sup>a\*</sup>*

<sup>a</sup> College of Textile Science and Engineering, Zhejiang Sci-Tech University, Hangzhou, 310018, China

<sup>b</sup> School of Science, Huzhou University, Huzhou, 313000, Zhejiang, China

**\* Corresponding Authors: [lxsong12@zstu.edu.cn](mailto:lxsong12@zstu.edu.cn) (LX Song); [jxiong@zstu.edu.cn](mailto:jxiong@zstu.edu.cn) (J Xiong).**

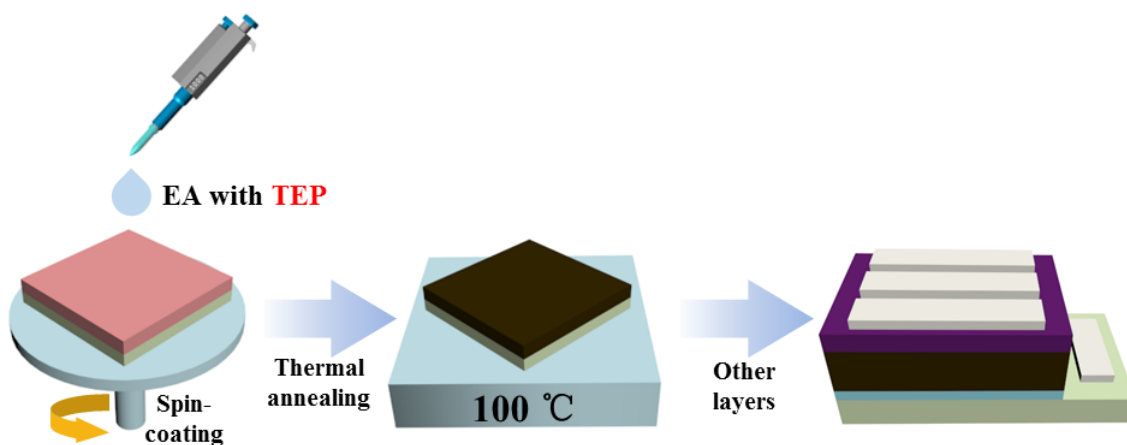

**Fig. S1.** The schematic diagram of fabricate high-efficiency and stable perovskite ( $\text{MAPbI}_3$ ) solar cells under ambient environment. The complete structure of device is FTO-etched glass/ $\text{TiO}_2$ / $\text{MAPbI}_3$  (with or without TEP)/Spiro-OMeTAD/Ag.

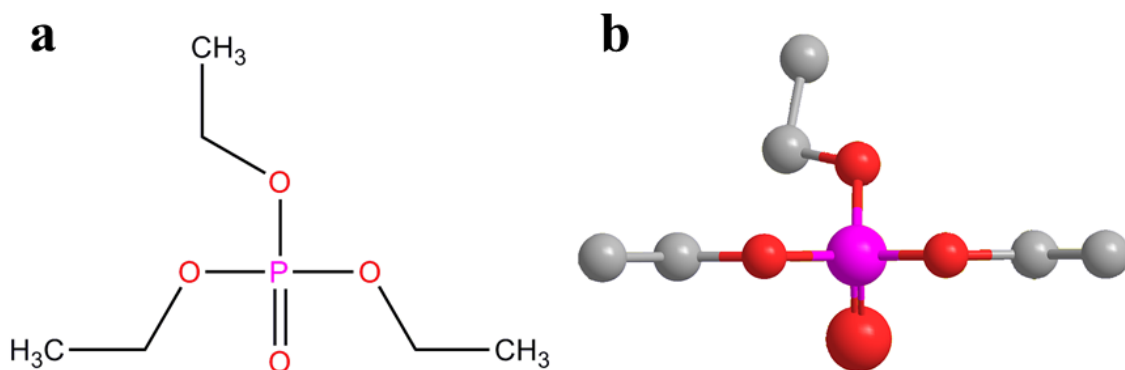

**Fig. S2.** The chemical structure (a) and the corresponding 3D model (b) of triethyl phosphate (TEP).

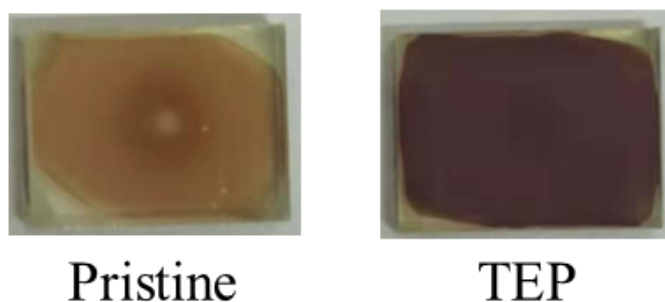

**Fig. S3.** The optical images of both perovskite films without and with the top perovskite seeds.

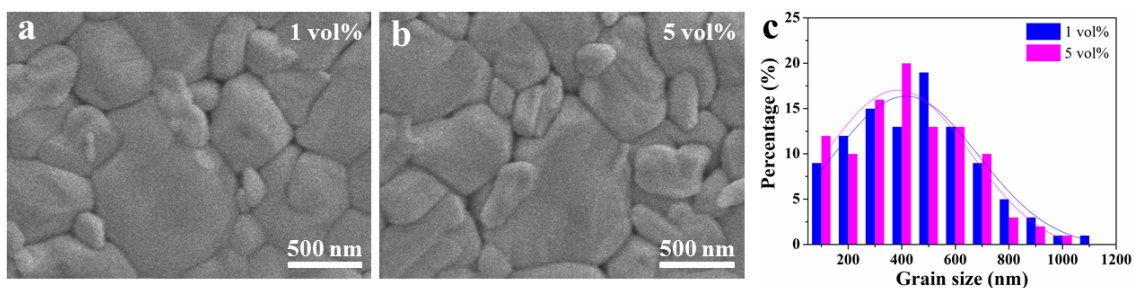

**Fig. S4.** (a and b) Top-view SEM images of perovskite films doping with different concentration (1 vol% and 5 vol%) of TEP.

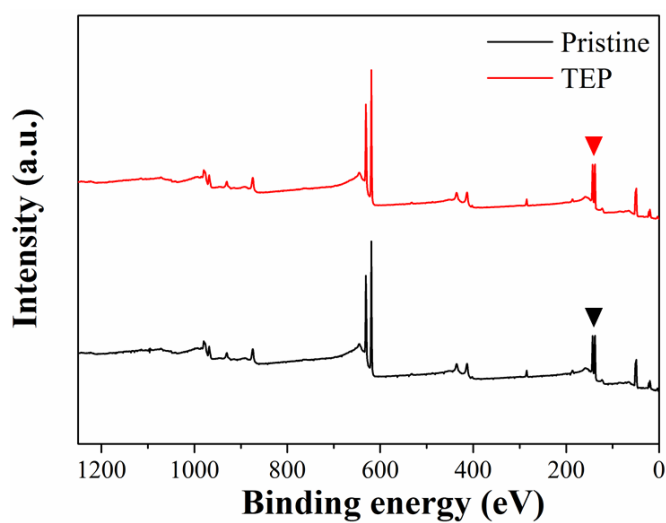

**Fig. S5.** The XPS spectra of survey the pristine and TEP modified perovskite films. The triangle marks are Pb 4f core level.

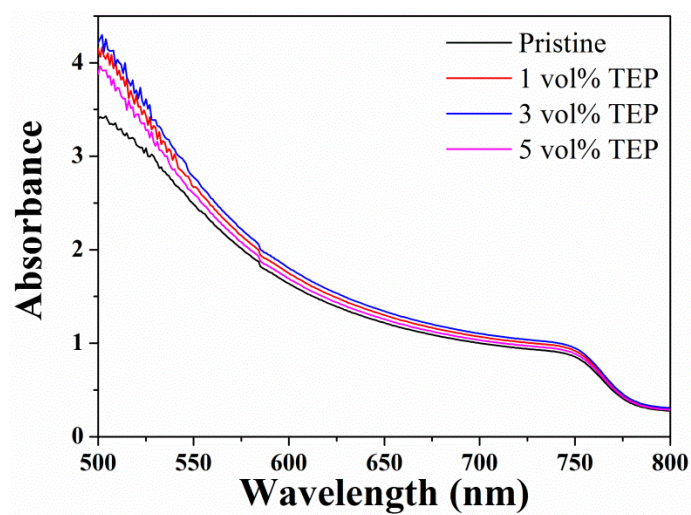

**Fig. S6.** The UV-Vis absorbance spectra of perovskite films which added different concentration (0 vol%, 1 vol%, 3 vol% and 5 vol%) of TEP.

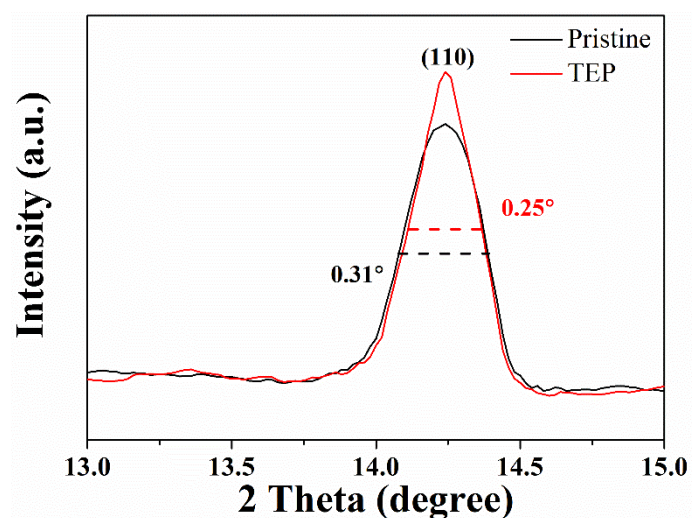

**Fig. S7.** The higher magnification patterns of XRD analysis around the (110) crystal plane.

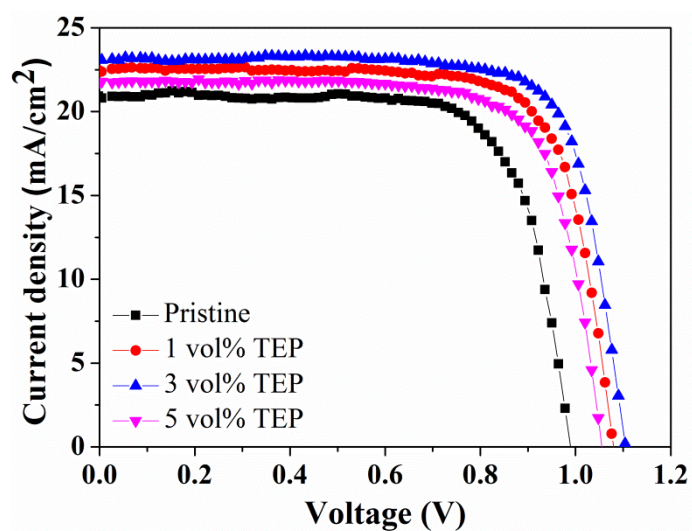

**Fig. S8.** The J-V curves of PSCs based on different concentration of TEP.

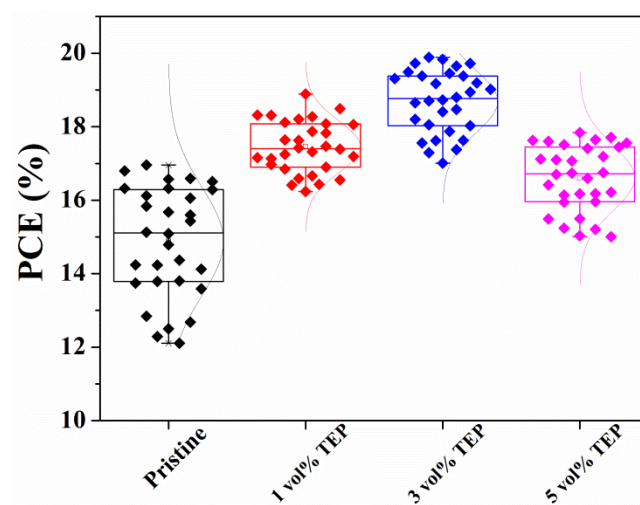

**Fig. S9.** Thirty individual cells' PCE of all kinds PSCs based on different concentration of

TEP.

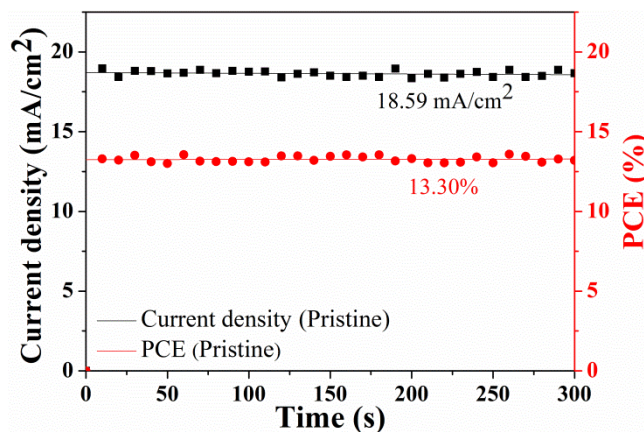

**Fig. S10.** Maximal steady-state photocurrent and stabilized PCE of pristine PSCs.

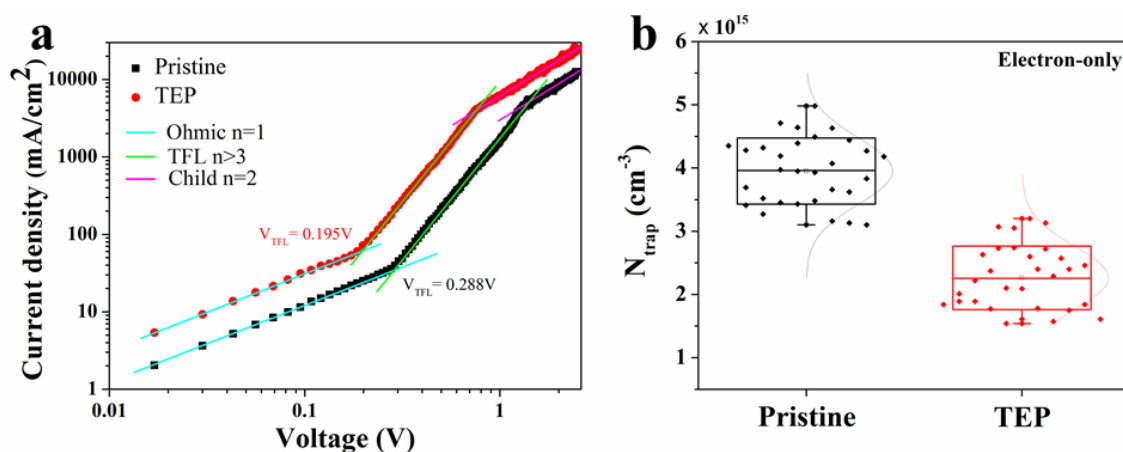

**Fig. S11.** (a) Dark J-V curves of electron-only PSCs with the structure of FTO/TiO<sub>2</sub>/MAPbI<sub>3</sub>/PC<sub>61</sub>BM/Ag. (b) The statistical collection of data on 30 sets samples of electron-only devices.

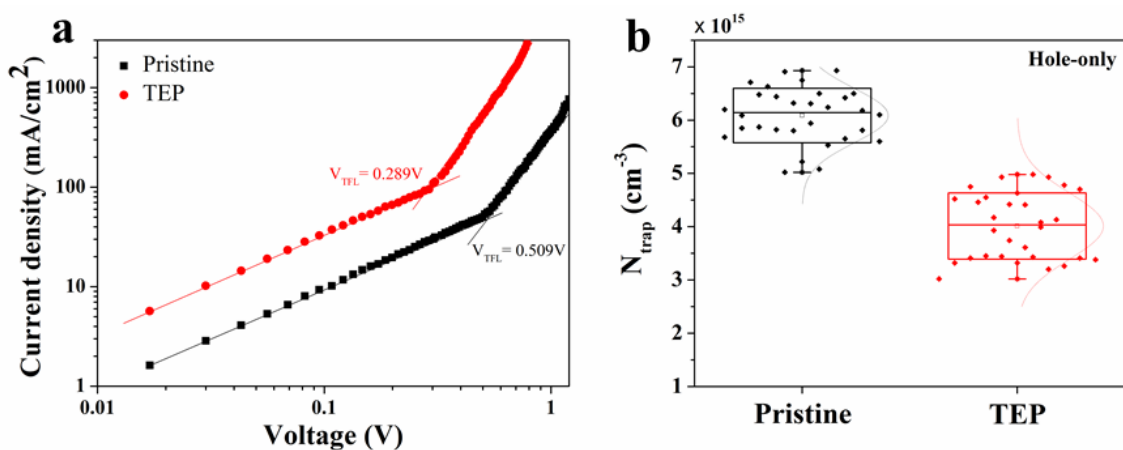

**Fig. S12.** The Dark J-V curves of (a) hole-only device (The complete structure of hole-only

device is FTO-etched glass/PEDOT:PSS/MAPbI<sub>3</sub> (with or without TEP)/Spiro-OMeTAD/Ag) and its statistical collection of 30 sets samples (b).

**Table S1.** Detailed photovoltaic parameters of PSCs with different concentrations of TEP.

| Samples    | J <sub>sc</sub> (mA/cm <sup>2</sup> ) | V <sub>oc</sub> (V) | FF (%) | PCE (%) |
|------------|---------------------------------------|---------------------|--------|---------|
| Pristine   | 20.81                                 | 0.98                | 74.53  | 15.20   |
| 1 vol% TEP | 22.38                                 | 1.08                | 75.96  | 18.36   |
| 3 vol% TEP | 23.08                                 | 1.10                | 77.20  | 19.60   |
| 5 vol% TEP | 21.79                                 | 1.05                | 75.13  | 17.19   |
